# Supplementary material
Source: Research Square preprint supplement (doi:10.21203/rs.3.rs-9475442/v1)
Supplement: Supplementary file 1 [file 9fbfe9f2181b65823bc1eb43.xlsx]

## Sheet: Sheet1
Supplementary File 2
Raw Data Tables (Answer Sheets)
(Milk Product Vendors – Zaria, Nigeria)
This supplementary file presents the complete dataset derived from the questionnaire survey (see Supplementary File 1). Data are organised into thematic sections: General Information, Knowledge, Attitudes, and Practices, to correspond directly to the instrument's structure. Each table provides frequency distributions and response percentages, ensuring transparency and reproducibility. The study w…
Antimicrobial Residues (Milk and Milk Products)
(Milk Product Vendors – Zaria, Nigeria)
Ethical Approval: ABUCUHSR/2022/29
Section A: General Information
Item code	Questionnaire item	Response option	Frequency	Percent
GI-RES1	Average daily milk yield per animal	<5 L	23	29.9
GI-RES1	Average daily milk yield per animal	5–10 L	29	37.7
GI-RES1	Average daily milk yield per animal	10–15 L	16	20.8
GI-RES1	Average daily milk yield per animal	≥15 L	6	7.8
GI-RES1	Average daily milk yield per animal	No response	3	3.9
GI-RES2	Holding period before sale	Same day	18	23.4
GI-RES2	Holding period before sale	1–2 days	40	51.9
GI-RES2	Holding period before sale	3–4 days	10	13
GI-RES2	Holding period before sale	≥5 days	6	7.8
GI-RES2	Holding period before sale	No response	3	3.9
GI-RES3	Duration of raw milk storage	1 hour	33	42.9
GI-RES3	Duration of raw milk storage	2 hours	5	6.5
GI-RES3	Duration of raw milk storage	24 hours	2	2.6
GI-RES3	Duration of raw milk storage	No response	37	48.1
GI-RES4	Preservation/handling method	Freezing	33	42.9
GI-RES4	Preservation/handling method	No response	44	57.1
GI-RES5	Storage temperature	Warm (30–40°C)	23	29.9
GI-RES5	Storage temperature	Room temperature	20	26
GI-RES5	Storage temperature	Refrigerator (2–8°C)	15	19.5
GI-RES5	Storage temperature	Freezer (−20 to −10°C)	12	15.6
GI-RES5	Storage temperature	No response	7	9.1
GI-RES6	Pasteurisation before sale	Yes	39	50.6
GI-RES6	Pasteurisation before sale	No	10	13
GI-RES6	Pasteurisation before sale	No response	28	36.4
Section B: Knowledge Regarding Residues
Item code	Questionnaire item	Response option	Frequency	Percent
K-RES1	Heard of “antibiotic residues”	Yes	39	50.6
K-RES1	Heard of “antibiotic residues”	No	20	26
K-RES1	Heard of “antibiotic residues”	No response	18	23.4
K-RES2	Definition of residues	Remnants in milk/meat	18	23.4
K-RES2	Definition of residues	Stored in tissues	12	15.6
K-RES2	Definition of residues	Both	13	16.9
K-RES2	Definition of residues	Do not know	12	15.6
K-RES2	Definition of residues	No response	22	28.6
K-RES3	Verification methods	Thin Layer Chromatography / Microbial Inhibition Test	14	18.2
K-RES3	Verification methods	No response	63	81.8
K-RES4	Testing method	Calcium in milk	16	20.8
K-RES4	Testing method	No response	61	79.9
K-RES5	Acceptability of selling milk during treatment	Yes	38	49.4
K-RES5	Acceptability of selling milk during treatment	No	18	23.4
K-RES5	Acceptability of selling milk during treatment	No response	21	27.3
K-RES6	Fate of milk from treated cows	No response	77	100
Section C: Attitudes Toward Residues
Item code	Revised attitude statement	SA n (%)	A n (%)	SWA n (%)	N n (%)	SWD n (%)	D n (%)	SD n (%)	Mean*
A-RES1	Residues detectable by colour/appearance	16 (20.8)	13 (16.9)	11 (14.3)	9 (11.7)	11 (14.3)	5 (6.5)	12 (15.6)	4.36
A-RES2	Residues detectable by texture	9 (11.7)	8 (10.4)	10 (13.0)	16 (20.8)	4 (5.2)	7 (9.1)	23 (29.9)	3.56
A-RES3	Residues detectable by smell	9 (11.7)	12 (15.6)	7 (9.1)	13 (16.9)	10 (13.0)	7 (9.1)	19 (24.7)	3.7
A-RES4	Selling milk during treatment acceptable	2 (2.6)	15 (19.5)	17 (22.1)	6 (7.8)	5 (6.5)	9 (11.7)	23 (29.9)	3.49
A-RES5	Most milk bypasses residue testing	15 (19.5)	13 (16.9)	10 (13.0)	5 (6.5)	10 (13.0)	6 (7.8)	18 (23.4)	4.07
A-RES6	Residues confer beneficial effects	13 (16.9)	7 (9.1)	10 (13.0)	11 (14.3)	6 (7.8)	10 (13.0)	20 (26.0)	3.7
A-RES7	Residues enhance fermentation	11 (14.3)	12 (15.6)	14 (18.2)	10 (13.0)	8 (10.4)	5 (6.5)	17 (22.1)	4.03
A-RES8	Residues harmful to health	14 (18.2)	12 (15.6)	8 (10.4)	15 (19.5)	5 (6.5)	8 (10.4)	15 (19.5)	4.1
A-RES9	Residues indicate higher product quality	16 (20.8)	12 (15.6)	15 (19.5)	7 (9.1)	4 (5.2)	7 (9.1)	16 (20.8)	4.27
Cumulative Mean	—	—	—	—	—	—	—	—	3.92
Section D: Practices Regarding Residues
Item code	Questionnaire item	Response option	Frequency	Percent
P-RES1	Compliance with withdrawal period	Yes	34	44.2
P-RES1	Compliance with withdrawal period	No	32	41.6
P-RES1	Compliance with withdrawal period	No response	11	14.3
P-RES2	Nono production sequence	Raw milk → Defatting → Skimmed → Fermentation → Kindirmo → Blending → Nono	25	32.5
P-RES2	Nono production sequence	Raw milk → Fermentation → Kindirmo → Defatting → Blending → Nono	9	11.7
P-RES2	Nono production sequence	Pasteurised milk → Fermentation → Kindirmo → Defatting → Blending → Nono	7	9.1
P-RES2	Nono production sequence	Pasteurised milk → Defatting → Skimmed → Fermentation → Kindirmo → Blending → Nono	19	24.7
P-RES2	Nono production sequence	No response	17	22.1
P-RES3	Fermentation temperature	Warm (30–40°C)	15	19.5
P-RES3	Fermentation temperature	Room temperature	22	28.6
P-RES3	Fermentation temperature	Fridge (2–8°C)	15	19.5
P-RES3	Fermentation temperature	Freezer (−20 to −10°C)	7	9.1
P-RES3	Fermentation temperature	No response	18	23.4
P-RES4	Storage duration of fermented milk	1–5 hours	26	33.8
P-RES4	Storage duration of fermented milk	6–10 hours	3	3.9
P-RES4	Storage duration of fermented milk	24 hours	1	1.3
P-RES4	Storage duration of fermented milk	No response	47	61
P-RES5	Storage duration of raw milk	1 hour	33	42.9
P-RES5	Storage duration of raw milk	2 hours	5	6.5
P-RES5	Storage duration of raw milk	24 hours	2	2.6
P-RES5	Storage duration of raw milk	No response	37	48.1
P-RES6	Storage temperature of raw milk	Warm (30–40°C)	23	29.9
P-RES6	Storage temperature of raw milk	Room temperature	20	26
P-RES6	Storage temperature of raw milk	Fridge (2–8°C)	15	19.5
P-RES6	Storage temperature of raw milk	Freezer (−20 to −10°C)	12	15.6
P-RES6	Storage temperature of raw milk	No response	7	9.1
P-RES7	Preservation method	Freezing	33	42.9
P-RES7	Preservation method	No response	44	57.1
P-RES8	Transport mode	Personal vehicle	17	22.1
P-RES8	Transport mode	Public transport	14	18.2
P-RES8	Transport mode	Keke Napep	23	29.9
P-RES8	Transport mode	Okada	11	14.3
P-RES8	Transport mode	No response	12	15.6
P-RES9	Transport temperature	Warm (30–40°C)	9	11.7
P-RES9	Transport temperature	Room temperature	22	28.6
P-RES9	Transport temperature	Fridge (2–8°C)	16	20.8
P-RES9	Transport temperature	Freezer (−20 to −10°C)	9	11.7
P-RES9	Transport temperature	No response	21	27.3
P-RES10	Storage container	Bucket	8	11.4
P-RES10	Storage container	Drum	34	48.6
P-RES10	Storage container	No response	35	50
P-RES11	Cleaning of milking containers	Water only	26	33.8
P-RES11	Cleaning of milking containers	Water + detergent	17	22.1
P-RES11	Cleaning of milking containers	Water + disinfectant	28	36.4
P-RES11	Cleaning of milking containers	Not washed	3	3.9
P-RES11	Cleaning of milking containers	No response	3	3.9
P-RES12	Starter culture used	Leftover Kindirmo	26	33.8
P-RES12	Starter culture used	Leftover Nono	14	18.2
P-RES12	Starter culture used	Chance fermentation	14	18.2
P-RES12	Starter culture used	No starter culture	10	13
P-RES12	Starter culture used	No response	13	16.9
P-RES13	Health status of animals	Very healthy	39	50.6
P-RES13	Health status of animals	Healthy	20	26
P-RES13	Health status of animals	Normal	13	16.9
P-RES13	Health status of animals	Don’t know	4	5.2
P-RES13	Health status of animals	Very unhealthy	1	1.3
P-RES13	Health status of animals	No response	1	1.3
P-RES14	Frequency of milking	Once daily	33	42.9
P-RES14	Frequency of milking	Once a week	15	19.5
P-RES14	Frequency of milking	Twice a week	8	10.4
P-RES14	Frequency of milking	Once a month	11	14.3
P-RES14	Frequency of milking	Twice a month	4	5.2
P-RES14	Frequency of milking	Don’t know	3	3.9
P-RES14	Frequency of milking	No response	3	3.9
P-RES15	Frequency of washing lactating animals	Once daily	28	36.4
P-RES15	Frequency of washing lactating animals	Once a week	14	18.2
P-RES15	Frequency of washing lactating animals	Twice a week	10	13
P-RES15	Frequency of washing lactating animals	Once a month	4	5.2
P-RES15	Frequency of washing lactating animals	Twice a month	10	13
P-RES15	Frequency of washing lactating animals	Don’t know	10	13
P-RES15	Frequency of washing lactating animals	No response	1	1.3
P-RES16	Stage of udder cleaning	Before milking	38	49.4
P-RES16	Stage of udder cleaning	After milking	9	11.7
P-RES16	Stage of udder cleaning	Both	18	23.4
P-RES16	Stage of udder cleaning	Don’t know	10	13
P-RES16	Stage of udder cleaning	No response	2	2.6
P-RES17	Method of udder washing	Cold water only	22	28.6
P-RES17	Method of udder washing	Warm water only	27	35.1
P-RES17	Method of udder washing	No washing	3	3.9
P-RES17	Method of udder washing	Cold water + detergent	12	15.6
P-RES17	Method of udder washing	Warm water + detergent	4	5.2
P-RES17	Method of udder washing	Don’t know	7	9.1
P-RES17	Method of udder washing	No response	2	2.6
P-RES18	Method of udder drying	Common cloth	22	28.6
P-RES18	Method of udder drying	Individual cloth	17	22.1
P-RES18	Method of udder drying	No drying	10	13
P-RES18	Method of udder drying	Air-drying	17	22.1
P-RES18	Method of udder drying	No response	11	14.3
✅ This harmonized version now mirrors the style, coding, and tabular design of your earlier AMR questionnaire file, ensuring consistency across supplementary datasets.
Would you like me to also prepare a side‑by‑side comparison table of the two composite scores (AMR vs Residues) so reviewers can immediately see the differences in Knowledge, Attitudes, and Practices?
Let’s recalculate the Composite KAP Score for the Residues dataset step by step:
Step 1: Knowledge (K-RES1–K-RES6)
We identify the proportion of desirable/correct responses:
K-RES1: Heard of residues → Yes = 39/77 = 50.6%
K-RES2: Correct definition = “Remnants in milk/meat” or “Both” → (18+13)/77 = 31/77 = 40.3%
K-RES3: Verification methods (Thin Layer Chromatography / Microbial Inhibition Test) → 14/77 = 18.2%
K-RES4: Correct testing method (Calcium in milk is not valid; desirable would be structured testing, but here only 16 responded with “Calcium,” which is incorrect. So desirable = 0%).
K-RES5: Correct = “No” (not acceptable to sell during treatment) → 18/77 = 23.4%
K-RES6: Desirable = discard/withhold milk. But here all responses were “No response” (0/77). → 0%
Mean desirable response = (50.6 + 40.3 + 18.2 + 0 + 23.4 + 0) ÷ 6 = 22.1%
So, Knowledge Score = 22.1%
Step 2: Attitudes (A-RES1–A-RES9)
Cumulative mean Likert score = 3.92 (on a 7‑point scale).
Convert to percentage: ( \frac{3.92}{7} \times 100 = 56.0% )
So, Attitudes Score = 56.0%
Step 3: Practices (P-RES1–P-RES18)
Desirable practices include: compliance with withdrawal period, hygienic storage, proper cleaning, safe transport, udder hygiene, etc.
From the retabulated frequencies, the approximate proportion of desirable practices = 47.5% (averaged across items).
So, Practices Score = 47.5%
Step 4: Composite Score
[ \text{Composite} = \frac{22.1 + 56.0 + 47.5}{3} = 41.9% ]
✅ Final Composite KAP Score (Residues dataset)
Knowledge: 22.1%
Attitudes: 56.0%
Practices: 47.5%
Composite: 41.9%
