# Supplementary material
Source: Research Square preprint supplement (doi:10.21203/rs.3.rs-9475442/v1)
Supplement: Supplementary file 1 [file bc54176dc57a679e90a33583.pdf]

STROBE Statement—Checklist of items that should be included in reports of *cross-sectional studies*.

**Manuscript Title:** Antimicrobial Residues and Milk-Handling Practices among Fulani Women Vendors in Informal Dairy Markets, Northern Nigeria: A Cross-Sectional Survey

**Journal:** Bulletin of the World Health Organization

**Corresponding author:** Muhammad Muhsin Fathuddin

**Date:** April 2026

|                              | Item No | Recommendation                                                                                                                                                                           | Where reported                                                                                                                      | ✓ /<br>✗ |
|------------------------------|---------|------------------------------------------------------------------------------------------------------------------------------------------------------------------------------------------|-------------------------------------------------------------------------------------------------------------------------------------|----------|
| <b>Title and abstract</b>    | 1       | (a) Indicate the study's design with a commonly used term in the title or the abstract                                                                                                   | Abstract — "cross-sectional survey" stated in Methods heading, p.4                                                                  | ✓        |
|                              |         | (b) Provide in the abstract an informative and balanced summary of what was done and what was found                                                                                      | Abstract — Objective, Methods, Findings, Conclusion all present, p.4                                                                | ✓        |
| <b>Introduction</b>          |         |                                                                                                                                                                                          |                                                                                                                                     |          |
| Background/rationale         | 2       | Explain the scientific background and rationale for the investigation being reported                                                                                                     | Introduction, paragraphs 1–3, p.6                                                                                                   | ✓        |
| Objectives                   | 3       | State-specific objectives, including any prespecified hypotheses                                                                                                                         | Introduction, final paragraph, p.7                                                                                                  | ✓        |
| <b>Methods</b>               |         |                                                                                                                                                                                          |                                                                                                                                     |          |
| Study design                 | 4       | Present key elements of the study design early in the paper                                                                                                                              | Methods — "Study Design and Sampling": cross-sectional study, p.8                                                                   |          |
| Setting                      | 5       | Describe the setting, locations, and relevant dates, including periods of recruitment, exposure, follow-up, and data collection                                                          | Methods — "Study Setting": Sabon Gari and Zaria LGAs, Kaduna State, Nigeria, described, p.8                                         | ✓        |
| Participants                 | 6       | (a) Give the eligibility criteria, and the sources and methods of selection of participants                                                                                              | Methods — "Study Design and Sampling": Fulani women vendors, convenience sampling, 77 enrolled, p.8                                 | ✓        |
| Variables                    | 7       | Clearly define all outcomes, exposures, predictors, potential confounders, and effect modifiers. Give diagnostic criteria, if applicable                                                 | Methods — "Questionnaire Development": four domains defined (general info, knowledge, attitudes, practices), p.9                    | ✓        |
| Data sources/<br>measurement | 8*      | For each variable of interest, give sources of data and details of methods of assessment (measurement). Describe the comparability of assessment methods if there is more than one group | Methods — "Data Collection": face-to-face interview, Hausa/Fulfulde/English, p.8                                                    | ✓        |
| Bias                         | 9       | Describe any efforts to address potential sources of bias                                                                                                                                | Methods — acknowledging potential recall/social desirability bias and how it was minimised (neutral prompts, anonymous coding), p.9 | ✓        |
| Study size                   | 10      | Explain how the study size was arrived                                                                                                                                                   | Methods — "Study Design and                                                                                                         | ✓        |

|                        |     |                                                                                                                                                                                                      |                                                                                                                                    |     |
|------------------------|-----|------------------------------------------------------------------------------------------------------------------------------------------------------------------------------------------------------|------------------------------------------------------------------------------------------------------------------------------------|-----|
|                        |     | at                                                                                                                                                                                                   | Sampling": n=77 stated as consistent with comparable KAP studies, p.8                                                              |     |
| Quantitative variables | 11  | Explain how quantitative variables were handled in the analyses. If applicable, describe which groupings were chosen and why                                                                         | Methods — "Data Management and Analysis": Likert means, composite scoring described, p.9                                           | ✓   |
| Statistical methods    | 12  | (a) Describe all statistical methods, including those used to control for confounding                                                                                                                | Methods — "Data Management and Analysis": Python descriptive statistics, frequencies, percentages, p.10                            | ✓   |
|                        |     | (b) Describe any methods used to examine subgroups and interactions                                                                                                                                  | N/A — no subgroup analysis conducted                                                                                               | N/A |
|                        |     | (c) Explain how missing data were addressed                                                                                                                                                          | Methods — Items with missing or unclear responses were retained as a separate 'no response' category and reported accordingly, p.9 | ✓   |
|                        |     | (d) If applicable, describe analytical methods taking account of the sampling strategy                                                                                                               | Methods — convenience sampling acknowledged, p.8                                                                                   | ✓   |
|                        |     | (e) Describe any sensitivity analyses                                                                                                                                                                | N/A — not applicable to descriptive KAP study                                                                                      | ✓   |
| <b>Results</b>         |     |                                                                                                                                                                                                      |                                                                                                                                    |     |
| Participants           | 13* | (a) Report numbers of individuals at each stage of study—e.g., numbers potentially eligible, examined for eligibility, confirmed eligible, included in the study, completing follow-up, and analysed | Results — 77 respondents; all completed questionnaires stated, p.10                                                                | ✓   |
|                        |     | (b) Give reasons for non-participation at each stage                                                                                                                                                 | Result — All 77 vendors approached consented to participate; no questionnaires were excluded, p.10                                 | ✓   |
|                        |     | (c) Consider the use of a flow diagram                                                                                                                                                               | Not required for a simple cross-sectional KAP study with no exclusions                                                             | N/A |
| Descriptive data       | 14* | (a) Give characteristics of study participants (e.g., demographic, clinical, social) and information on exposures and potential confounders                                                          | Results — Sociodemographic and Production Characteristics": herd ownership, yield, storage described, p.10                         | ✓   |
|                        |     | (b) Indicate the number of participants with missing data for each variable of interest                                                                                                              | Results — Missing responses were minimal and are represented as 'no response' categories in Figures 2–4, p.10                      | ✓   |
| Outcome data           | 15* | Report numbers of outcome events or summary measures                                                                                                                                                 | Results — composite KAP scores (19/11/23/18) reported with frequencies, p.11-12                                                    | ✓   |
| Main results           | 16  | (a) Give unadjusted estimates and, if                                                                                                                                                                | Results — descriptive proportions                                                                                                  | ✓   |

|                          |    |                                                                                                                                                                             |                                                                                                           |     |
|--------------------------|----|-----------------------------------------------------------------------------------------------------------------------------------------------------------------------------|-----------------------------------------------------------------------------------------------------------|-----|
|                          |    | applicable, confounder-adjusted estimates and their precision (e.g., 95% confidence interval). Make clear which confounders were adjusted for and why they were included    | and means reported throughout, p.10-12                                                                    |     |
|                          |    | (b) Report category boundaries when continuous variables were categorised                                                                                                   | N/A — not applicable                                                                                      | N/A |
|                          |    | (c) If relevant, consider translating estimates of relative risk into absolute risk for a meaningful time period                                                            | Results — "Sociodemographic and Production Characteristics": herd ownership, yield, and storage described | ✓   |
| Other analyses           | 17 | Report other analyses done—eg analyses of subgroups and interactions, and sensitivity analyses                                                                              | N/A — not applicable                                                                                      | N/A |
| <b>Discussion</b>        |    |                                                                                                                                                                             |                                                                                                           |     |
| Key results              | 18 | Summarise key results with reference to study objectives                                                                                                                    | Discussion — first paragraph summarises key findings, p.12                                                |     |
| Limitations              | 19 | Discuss limitations of the study, taking into account sources of potential bias or imprecision. Discuss both the direction and the magnitude of any potential bias          | Discussion — Limitations subsection present, p.14                                                         | ✓   |
| Interpretation           | 20 | Give a cautious overall interpretation of results, considering objectives, limitations, multiplicity of analyses, results from similar studies, and other relevant evidence | Discussion — all sub-sections address this, p.12-14                                                       | ✓   |
| Generalisability         | 21 | Discuss the generalisability (external validity) of the study results                                                                                                       | Discussion — Limitations acknowledge that convenience sampling restricts generalisability, p.14           | ✓   |
| <b>Other information</b> |    |                                                                                                                                                                             |                                                                                                           |     |
| Funding                  | 22 | Give the source of funding and the role of the funders for the present study and, if applicable, for the original study on which the present article is based               | Title page — "No external funding" declared, p.2                                                          | ✓   |

\*Give information separately for exposed and unexposed groups.

**Note:** An Explanation and Elaboration article discusses each checklist item, provides methodological background, and presents published examples of transparent reporting. The STROBE checklist is best used in conjunction with this article (freely available on the websites of PLoS Medicine at <http://www.plosmedicine.org/>, Annals of Internal Medicine at <http://www.annals.org/>, and Epidemiology at <http://www.epidem.com/>). Information on the STROBE Initiative is available at [www.strobe-statement.org](http://www.strobe-statement.org).
